# Supplementary material
Source: PubMed Central journal article supplement (PMC4922153)
Supplement: pnas.1521341113.sapp.pdf [file pnas.1521341113.sapp.pdf]

**Supporting Information Appendix for:**

**A Premeiotic Function for *boule* in the Planarian *Schmidtea mediterranea***

Harini Iyer, Melanie Issigonis, Prashant P. Sharma, Cassandra G. Extavour, and Phillip  
A. Newmark

Correspondence to: [pnewmark@life.illinois.edu](mailto:pnewmark@life.illinois.edu)

**This SI appendix includes:**

Detailed Supplementary Methods

Supplementary Figure Legends

Supplementary Figures S1-S10

Supplementary Tables S1-S4

## Detailed Supplementary Methods

### In situ hybridization

For colorimetric in situ hybridization (ISH) and fluorescent in situ hybridization (FISH), animals were killed with 10% N-acetyl cysteine (Sigma-Aldrich, St. Louis, MO), for 7.5 minutes, and then fixed in 4% formaldehyde in PBSTx (1X PBS+0.3% Triton X-100) for 20 minutes at room temperature.

Animals were dehydrated in 50% followed by 100% Methanol and stored in  $-20^{\circ}\text{C}$  until use. Animals were rehydrated in increasing concentrations of PBSTx, and bleached in freshly prepared Formamide bleaching solution (5% non-ionized Formamide, 0.5X SSC, and 1.2%  $\text{H}_2\text{O}_2$ ) for 3 hours. After bleaching, animals were treated with Proteinase K solution (100  $\mu\text{l}$  of 10% SDS and 5  $\mu\text{l}$  of 20 mg/ml Proteinase K (Invitrogen) in 9.9 ml of PBSTx) and post-fixed in 4% Formaldehyde. Following washes to remove the fixative, hybridization was carried out at  $56^{\circ}\text{C}$  for 16 hours at a riboprobe concentration of 0.1-0.5 ng/ $\mu\text{l}$ . After post-hybridization washes, samples were blocked in Blocking solution (5% horse serum and 0.5% Roche Western Blocking Reagent in MABT). Samples were incubated in primary antibody (anti-digoxigenin alkaline phosphatase (Roche) 1:1000, or anti-digoxigenin peroxidase (Roche) 1:1000) overnight at  $12^{\circ}\text{C}$ . For FISH, DAPI was added to the primary antibody solution (1:10,000 of 10 mg/ml stock). Samples were washed in MABT (100 mM Maleic acid, 150 mM NaCl, 0.1% Tween-20, pH 7.5). Colorimetric development was carried out in AP buffer (100 mM Tris, pH 9.5; 100 mM NaCl; 50 mM  $\text{MgCl}_2$ , 0.1% Tween-20 brought up to volume with 10% polyvinylalcohol (Sigma)) containing 4.5  $\mu\text{l}/\text{ml}$  NBT and 3.5  $\mu\text{l}/\text{ml}$  BCIP (Roche). For FISH, development was done in freshly made Tyramide solution (Fluor-tyramide (1:250-1:500), 4-IPBA (1:1000), and  $\text{H}_2\text{O}_2$  (0.003%) in TSA buffer (2 M NaCl, 0.1 M Boric acid, pH 8.5). 4-IPBA is 20 mg/ml of 4-iodophenylboronic acid in



dimethylformamide (DMF) stored at  $-20^{\circ}\text{C}$ . Samples were washed 6-8 times ( $\sim 20$  minutes each wash) in TNTx.

### **TUNEL on sections**

After two dsRNA feedings planarians were starved for a week and treated with 10% N-acetyl-L-cysteine for 7.5 minutes and fixed in 4% formaldehyde in PBSTx (0.3% Triton X-100) for 20 minutes at room temperature. Cryosectioning was done to generate 15-20  $\mu\text{m}$  sections. Sections were rehydrated and treated with pre-chilled ethanol:acetic acid (2:1) at  $-20^{\circ}\text{C}$  for 5 minutes. The slides were rinsed twice in DI water and equilibrated in equilibration buffer (100 mM Tris-HCl pH 7.5 + 1 mg/ml IgG-free BSA). Slides were covered with TdT solution (0.5  $\mu\text{l}$  NEB TdT (Cat. No. M0252L), 2  $\mu\text{l}$  NEB buffer 4, 2  $\mu\text{l}$  2.5 mM  $\text{CoCl}_2$ , 0.8  $\mu\text{l}$  1:50 DIG-dUTP in dATP, 14.7  $\mu\text{l}$  water) and incubated at  $37^{\circ}\text{C}$  in a dark humidified chamber for 1 hour. After rinsing 3X with PBSTx, the sections were blocked with 5% Horse Serum (Sigma H1138) in PBSTx for 2 hours. Block was replaced with 1:1000 anti-DIG-POD (Roche 11207733910) diluted in block solution. DAPI (1  $\mu\text{g}/\text{ml}$ ) was added at this step. Sections were covered with coverslips and incubated for overnight at  $4^{\circ}\text{C}$ . Slides were rinsed in PBSTx and signal was revealed using TAMRA-tyramide. Slides were rinsed in PBSTx and mounted in Vectashield.

### **Imaging**

Colorimetric in situ samples were mounted in 80% glycerol and images were captured with a Leica DFC420 camera mounted on a Leica M205A stereomicroscope (Leica, Wetzlar, Germany). Whole-mount FISH samples were mounted in Vectashield (Vector Laboratories, Burlingame, CA) and imaged on a Zeiss Stereo Lumar V12 (Carl Zeiss, Germany). For confocal imaging, FISH samples were mounted in Vectashield and images were obtained on a Zeiss LSM 710 confocal microscope (Carl

Zeiss). Images were processed (cropping, brightness and contrast adjustments to entire image) using Adobe Photoshop CS4/CS5 and/or Zen 2008/9/11.

### **Quantitative real-time PCR**

Total RNA was extracted using TRIzol (Invitrogen) according to manufacturer's instructions, DNase (Fisher Scientific) treated and cleaned using an RNA clean up kit (Zymo) before reverse transcription (iScript, Bio-Rad). Prior to RNA extraction, animals were starved for 7 days after the last RNAi feeding to ensure that any remnant dsRNA was cleared from the system. qRT-PCR was performed using GoTaq qPCR master mix (Promega) using Applied Biosystems StepOne Plus RT-PCR system. All experiments were done in biological and technical triplicates. Transcript levels were normalized to  *$\beta$ -tubulin*. Relative mRNA levels were calculated using  $\Delta\Delta CT$ . All primers are listed in SI Appendix, Table S4.

## Supplementary Figure Legends

**Figure S1. Planarian *boule* homologs are expressed in the ovaries.** Colorimetric in situ hybridization for *boule1* and *boule2* showing expression in the female reproductive system. *boule1* expression was seen in the ovaries of some animals (n=3/8) and possible *boule2* expression was detected in the ventral portion of the animals (n=7/7), where the ovaries are located. Scale bars, 100  $\mu$ m.

**Figure S2. *boule1* and *boule2* are expressed in spermatogonial stem cells (SSCs) and spermatogonia in the male germline.** Double fluorescence in situ hybridization (FISH) showing (A) *boule1* and (B) *boule2* coexpressed with *nanos*, which labels SSCs. Scale bars, 50  $\mu$ m. Magnified sections showing colocalization of (A') *boule1* and (B') *boule2* with *nanos* (arrows). *nanos*<sup>+</sup> cells show lower intensity of *boule1* signal than the surrounding spermatogonia. Scale bars, 10  $\mu$ m. (C) *boule1* and (D) *boule2* are coexpressed with *germinal histone H4 (gH4)* transcript in the male gonads. *gH4* labels SSCs and spermatogonia in the male germline. Scale bars, 50  $\mu$ m.

**Figure S3. Effect of *boule1* or *boule2* RNAi on SSCs and spermatids** (A) Distinct stages of planarian spermatogenesis and labels for individual testis cell types. *nanos* and *germinal histone H4* (in magenta) label SSCs and spermatogonia, respectively. *tektin-1* and *protein kinase A* (in cyan) label spermatocytes and spermatids respectively. (B) Following 2 feedings of *boule1* and *boule2* dsRNA (intermediate knockdown), *boule1*(RNAi) animals have SSCs (labeled by *nanos*) similar to controls (n=6/6). Half (n=3/6) the *boule2*(RNAi) animals show *nanos* expression and the remaining 3 animals have no *nanos*<sup>+</sup> SSCs. The spermatid population, labeled with *pka*, is slightly reduced in *boule1*(RNAi) animals, and the *gH4*<sup>+</sup> spermatogonial population is expanded (n=5/5). *boule2*(RNAi) animals show *pka* labeling

comparable to controls (n=6/6). **(C)** At later stages, following 4 feedings of dsRNA *boule1(RNAi)* animals have testes with clusters of SSCs and spermatogonia, and animals lack meiotic and postmeiotic cells (n=5/5). *boule2(RNAi)* animals show a complete loss of all male germ cells (n=6/6). Scale bars, 50  $\mu\text{m}$ .

**Figure S4. Demonstration of *boule1* or *boule2* RNAi specificity.** **(A)** Alignment of *boule1* and *boule2* nucleotide sequences showing no significant similarity between the sequences. **(B)** and **(C)** show qRT-PCR validation of *boule1* or *boule2* knockdown following a single dsRNA feeding. **(B)** Following *boule1(RNAi)* there is an increase in *boule2* transcript, most likely due to accumulation of spermatogonia, in which *boule2* is expressed. **(C)** The levels of *boule1* transcript are similar to controls in *boule2(RNAi)* animals. Two-tailed unpaired t-test with Welch's correction was performed for all samples,  $P < 0.05$ . **(D)** FISH for *boule1* or *boule2* was performed following 2 dsRNA feedings of either gene. Our experiments show that the knockdown of either *boule1* or *boule2* does not affect the expression of the other paralog. Scale bars, 50  $\mu\text{m}$ .

**Figure S5. *boule2(RNAi)* animals show increased apoptosis.** TUNEL was performed on cryosections following 2 feedings of *boule1* or *boule2* dsRNA. **(A)** *boule2(RNAi)* animals show a greater number of TUNEL<sup>+</sup> cells in the testes compared to control and *boule1* knockdown animals. Scatter plot shows mean with standard deviation. One-way ANOVA was performed using Dunnett's multiple comparisons test to determine significance at 95% confidence interval. **(B)** Representative images showing TUNEL<sup>+</sup> cells (arrows) in *boule2(RNAi)* animals. Scale bars, 20  $\mu\text{m}$ .

**Figure S6. Validation of *boule1* and *boule2* gene knockdowns in regenerates and hatchlings (A)** *dmd1(RNAi)* head fragments do not respecify their SSCs 14 days post amputation (n=4/4). Scale bars, 100  $\mu$ m. **(B)** qRT-PCR for samples corresponding to Figures 2A and B. Relative mRNA levels of *boule1* and *boule2* are low after 14 days of regeneration. Error bars represent 95% confidence intervals calculated based on standard error of the mean. Two-tailed unpaired t-test with Welch's correction was performed for all samples, P<0.05. **(C,D)** Knockdown phenotype of *boule1* or *boule2* in sexual hatchlings (<48 hours old) is similar to the RNAi phenotype in adults. **(C)** Following two feedings of *boule1* dsRNA, *nanos* and *gH4* expression appears comparable to control animals (n=6/6). Some *boule2(RNAi)* animals (n=2/6) show absence of male germ cells, and the remaining animals (n=4/6) show very small testis lobes with both *nanos*<sup>+</sup> and *gH4*<sup>+</sup> germ cells. **(D)** After 4 feedings of *boule1* dsRNA, animals show accumulation of spermatogonia compared to controls, and *boule2(RNAi)* animals lack all male germ cells. Scale bars, 50  $\mu$ m.

**Figure S7. Assay for determining the role of *boule1* and *boule2* in male germline regeneration and differentiation. (A)** Experimental schematic. When planarians are amputated posterior to their ovaries, the resulting tail fragments regress their testes approximately 7 days post-amputation, and contain clusters of early, undifferentiated male germ cells. Tail regenerates were fed *boule1* or *boule2* dsRNA (4 feedings, 4-5 days apart) after amputation and testes regression. **(B)** Testes were restored in control regenerates (n=6/6). *boule1(RNAi)* regenerates had small testis lobes containing only SSCs and spermatogonia (n=5/6). By contrast, in *boule2(RNAi)* regenerates, all the male germ cells were absent (n=6/6). **(C)** qRT-PCR validation. Amputated animals at the beginning of RNAi show low levels of *tkn-1* (spermatocytes) and *pka* (spermatids). Error bars represent 95% confidence intervals calculated based

on standard error of the mean. Two-tailed unpaired t-test with Welch's correction was performed for all samples,  $P < 0.05$ .

**Figure S8. Additional experiments with putative planarian DAZ family-associated proteins. (A)** Control (RNAi) animals show the expression of all four germ cell markers. **(B)** *DAZAP2* is not required for the maintenance of the male germ cells in homeostasis ( $n=6/6$ ). **(C)** *DAZAP1(RNAi)* and **(D)** *iguana(RNAi)* in homeostasis results in no change in SSC (*nanos*<sup>+</sup>) population and an accumulation of rounded spermatids (*pka*<sup>+</sup>) population ( $n=6/6$  for both). **(E-F)** *DAZAP1(RNAi)* in sexually immature regenerates corroborates the gene's homeostasis phenotype, with animals showing no mature sperm ( $n=4/6$ ). *iguana(RNAi)* animals undergo lysis upon amputation ( $n=6/6$ , Table S1). Scale bars, 50  $\mu\text{m}$ .

**Figure S9. Additional experiments on putative planarian DAZ family targets. (A)** Planarian homologs of DAZ/DAZL targets are expressed in the male germline. Scale bars, 1mm. **(B-D)** *SDADI(RNAi)*, *CDC25-1(RNAi)* and *CDC25-2(RNAi)* have SSCs (*nanos*) and spermatids (*pka*) ( $n=6/6$  for all except *SDADI*) at early stages of knockdown. Half ( $n=3/6$ ) of *SDADI(RNAi)* animals show no *nanos* labeling. *CDC25-1* knockdown results in enlarged SSCs possibly due to defects in cytokinesis (see insets in B and D). Sexually immature regenerates fed **(E)** control dsRNA regenerate their testes, whereas **(F)** in the absence of *CDC25-2*, regenerates cannot maintain the early male germ cells, similar to *boule2(RNAi)* animals ( $n=6/6$ ). *SDADI(RNAi)* and *CDC25-1(RNAi)* animals undergo lysis upon amputation ( $n=6/6$  for both, Table S2). Scale bars, 50  $\mu\text{m}$ ; inset scale bars, 10  $\mu\text{m}$ .

**Figure S10. Phylogenetic analyses of the DAZ family (A)** Alignment of Boule, DAZL, and DAZ RRM. **(B)** Branch length ratios of pre-meiotic (Smed-Boule2 or Dazl) to meiotic (Smed-Boule1 or

vertebrate Boule) terminal edge lengths in planarians and vertebrates. Note the markedly similar distribution of paralog branch length ratios in species with neofunctionalized Boule derivatives.

**Table S1. Experimental details for planarian homologs of DAZ-associated proteins**

**Table S2. Experimental details for planarian homologs of DAZ family targets**

**Table S3. Accession numbers of sequences used for phylogenetic analyses**

**Table S4. Cloning and qRT-PCR primer sequences**

**Figure S1**

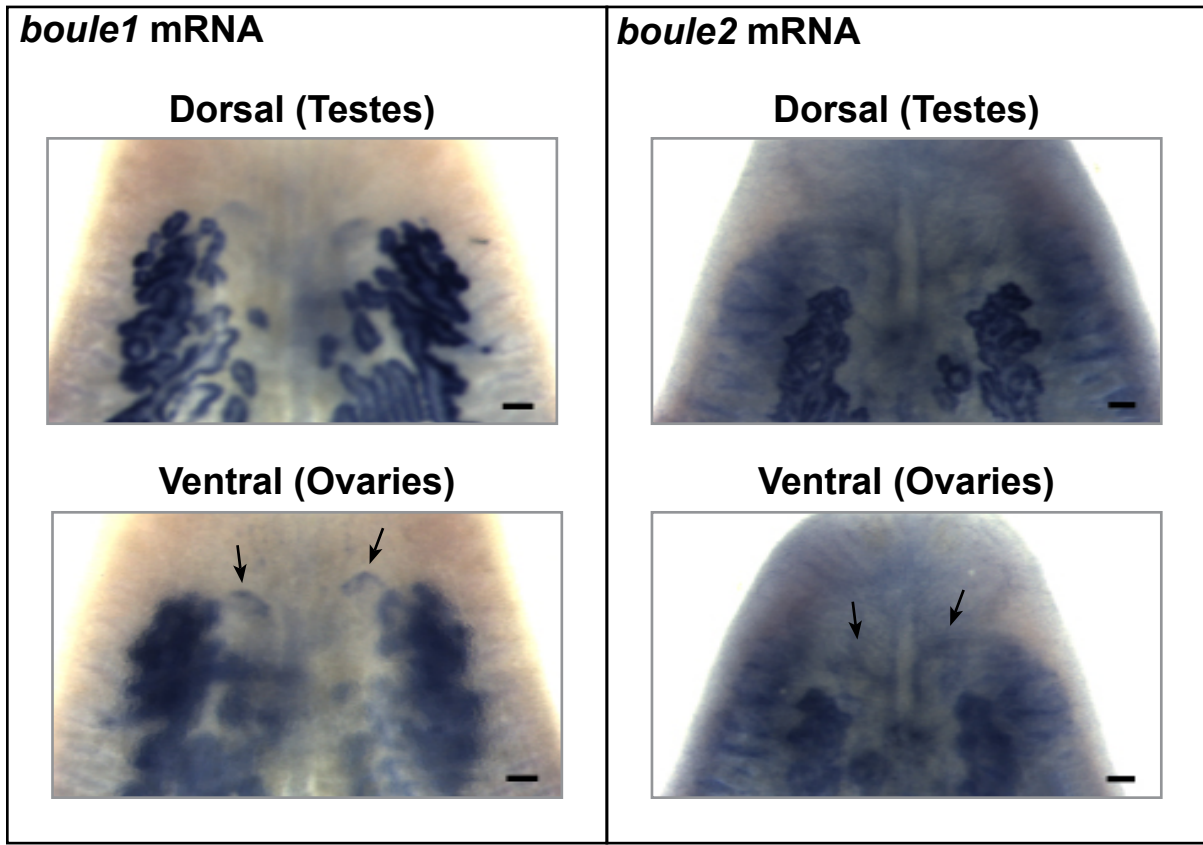



Figure S2

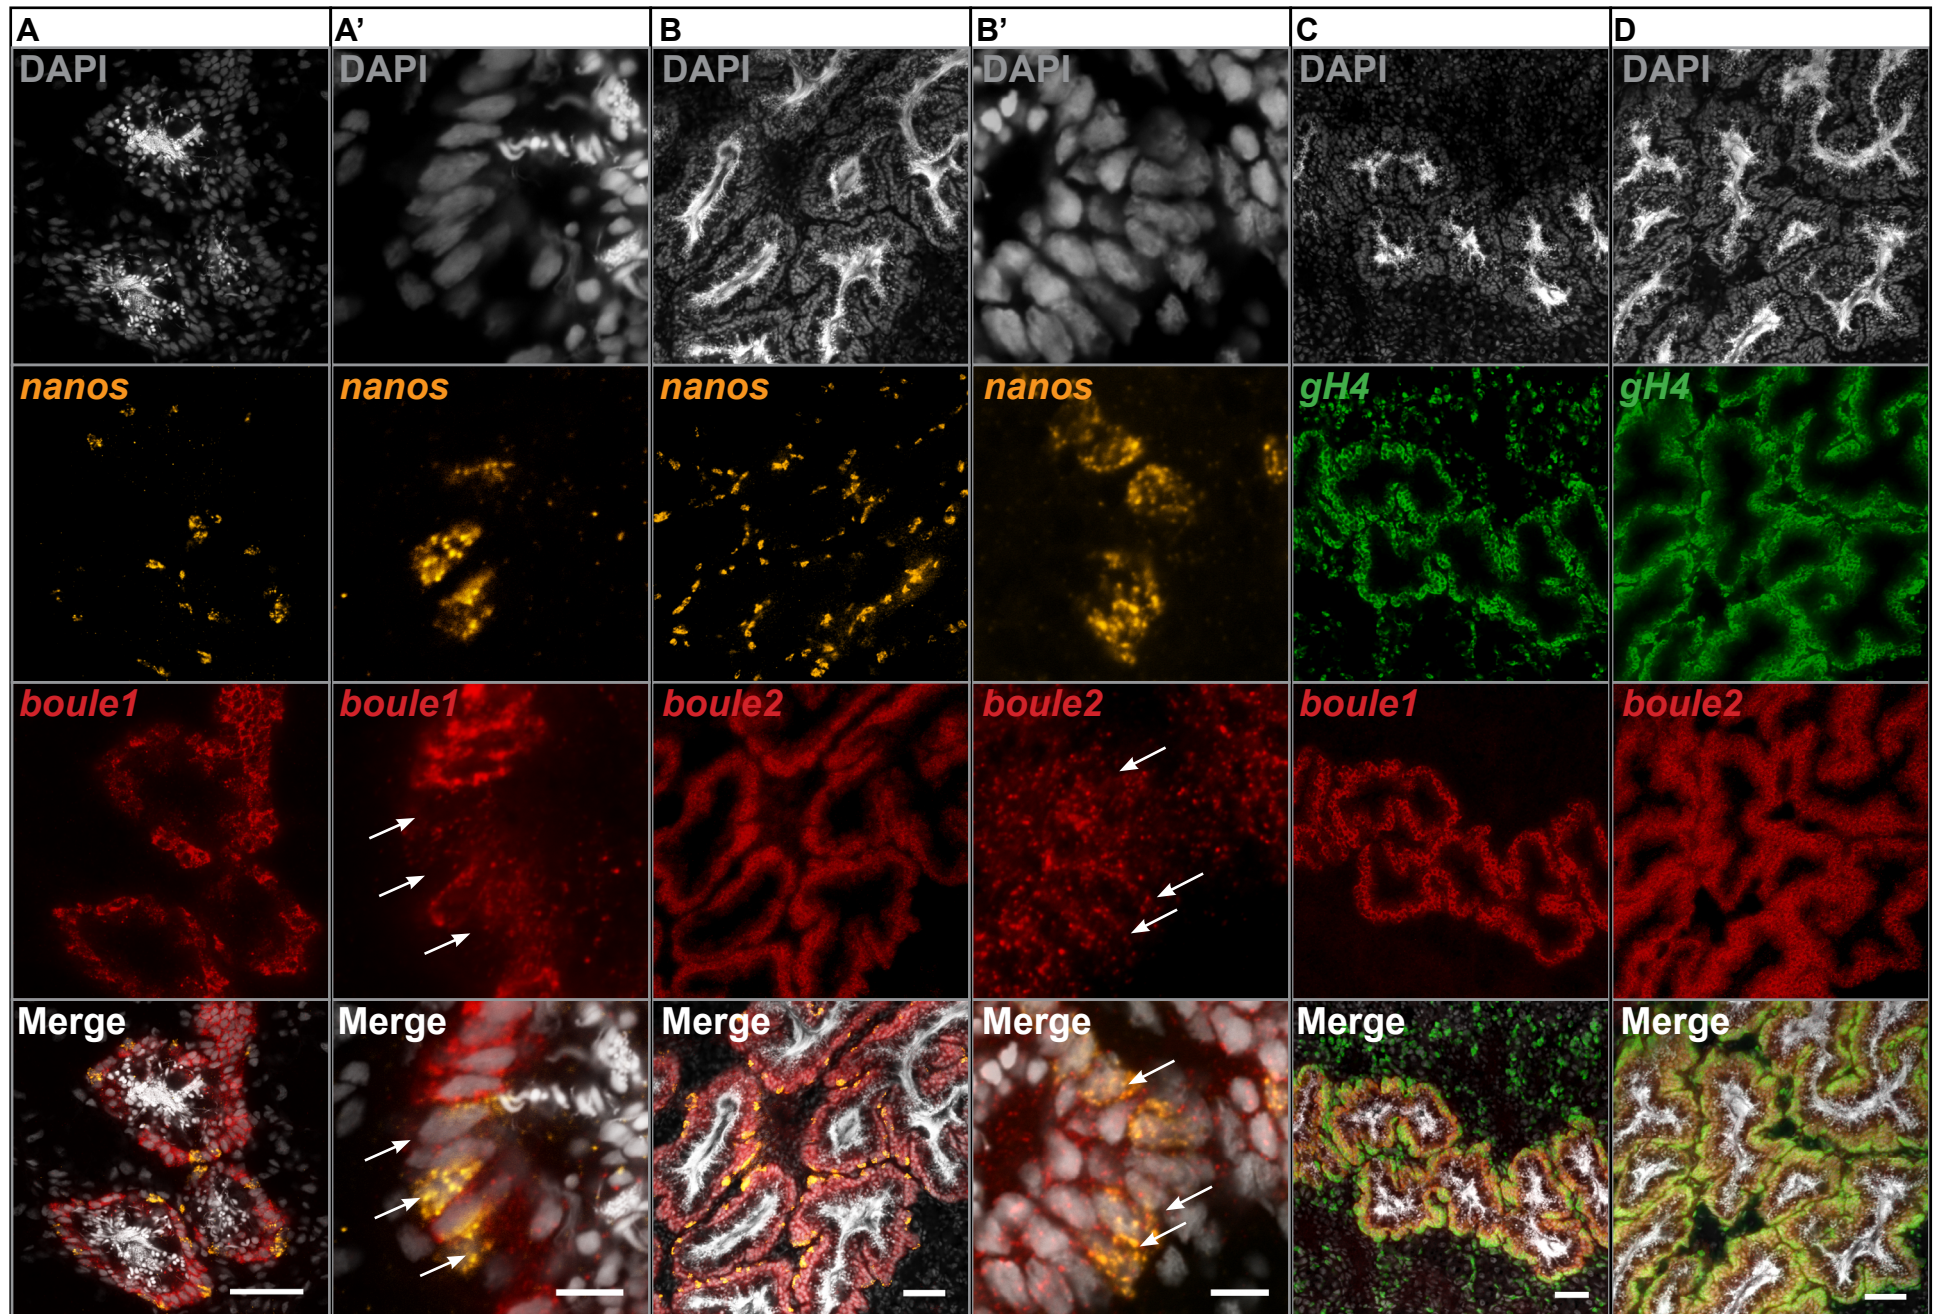



Figure S3

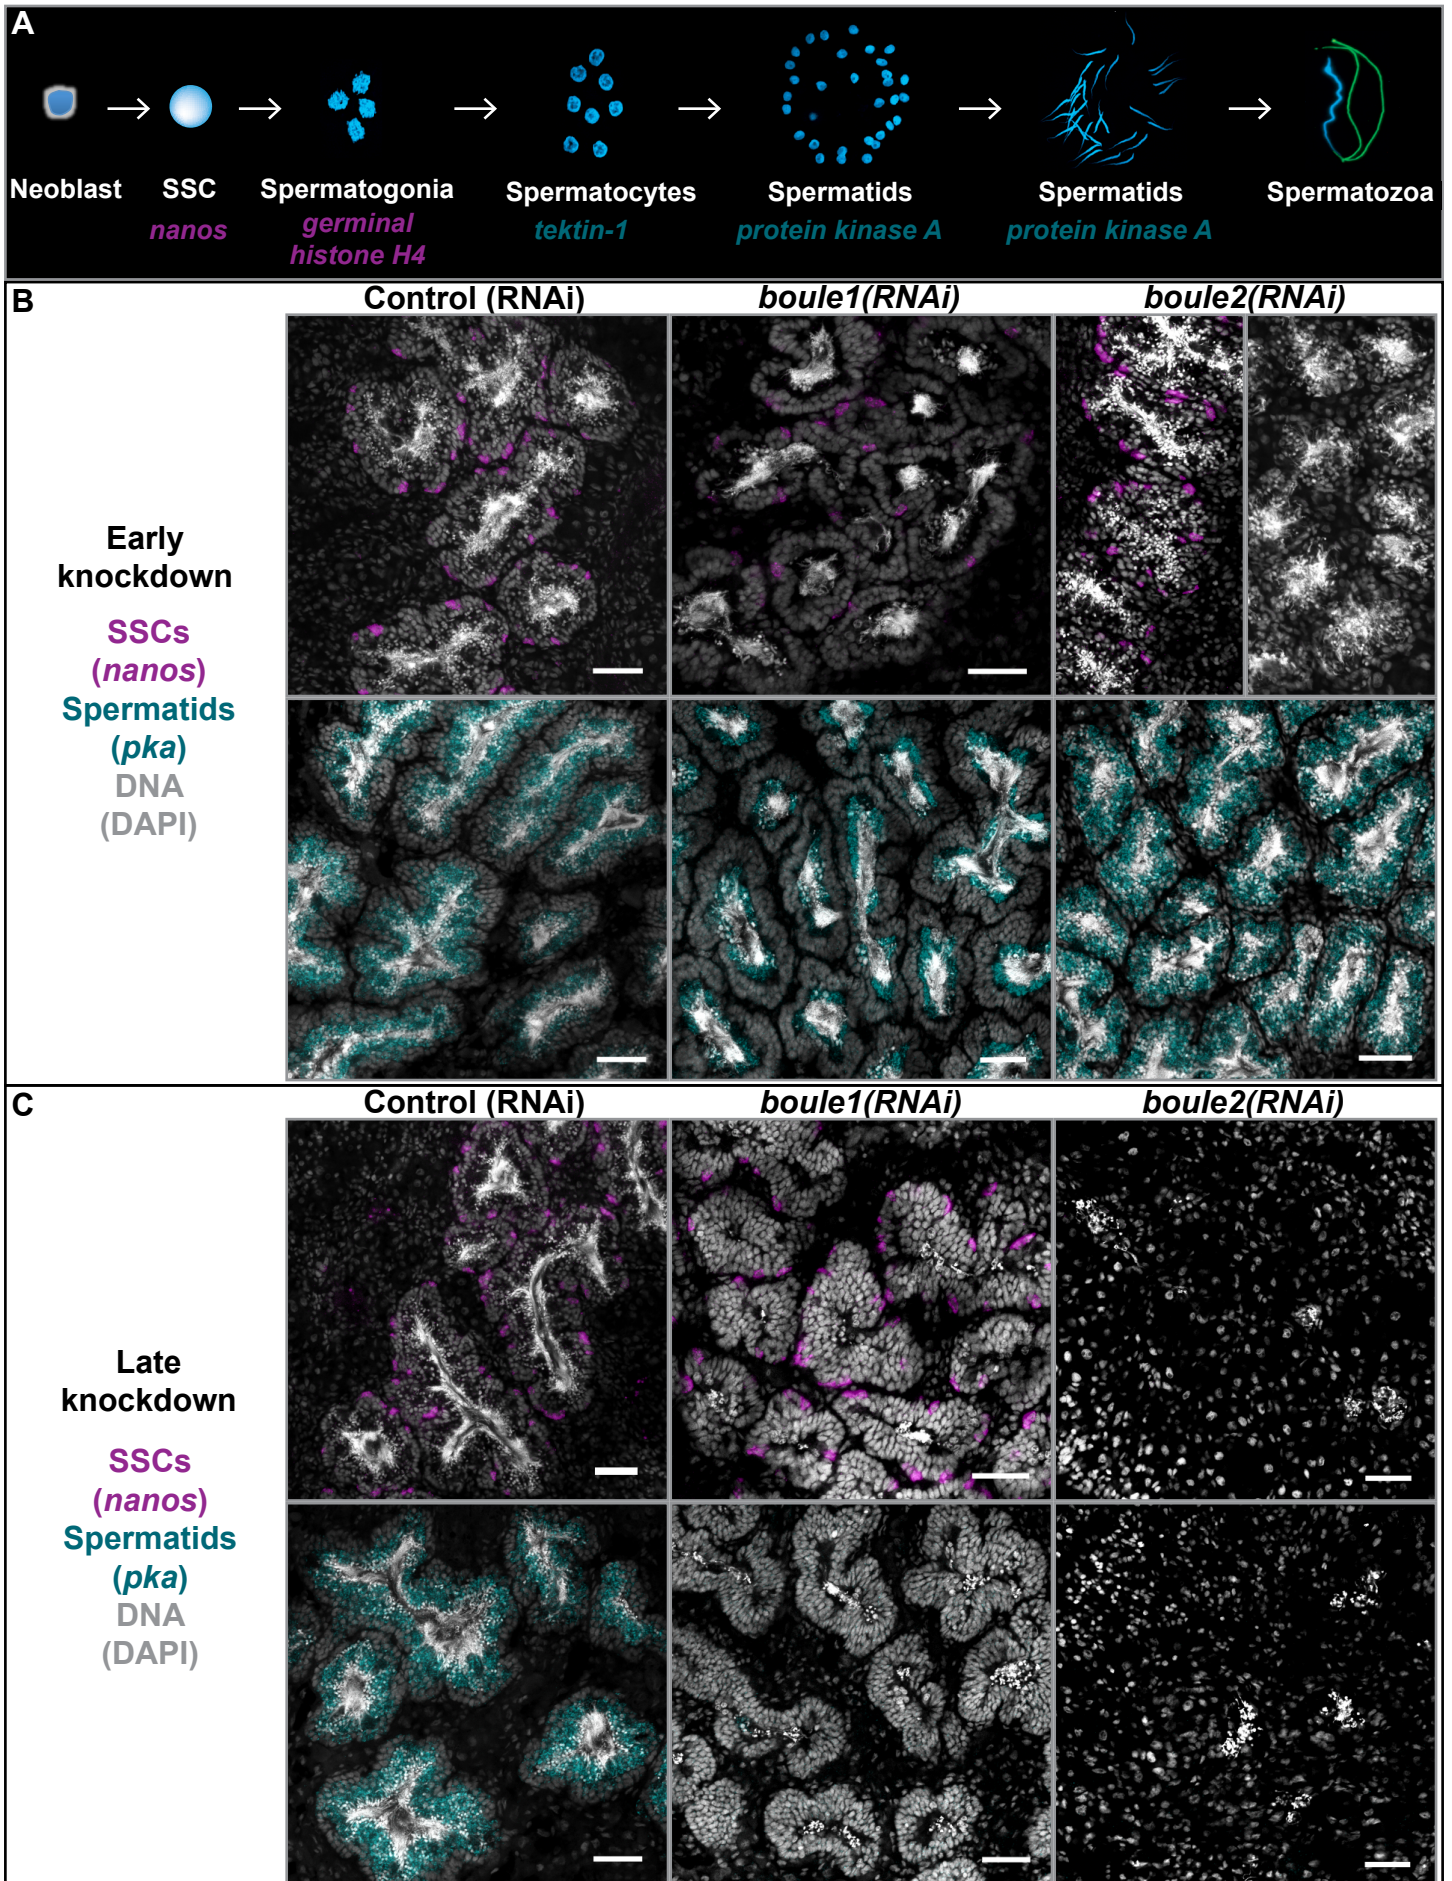



Figure S4

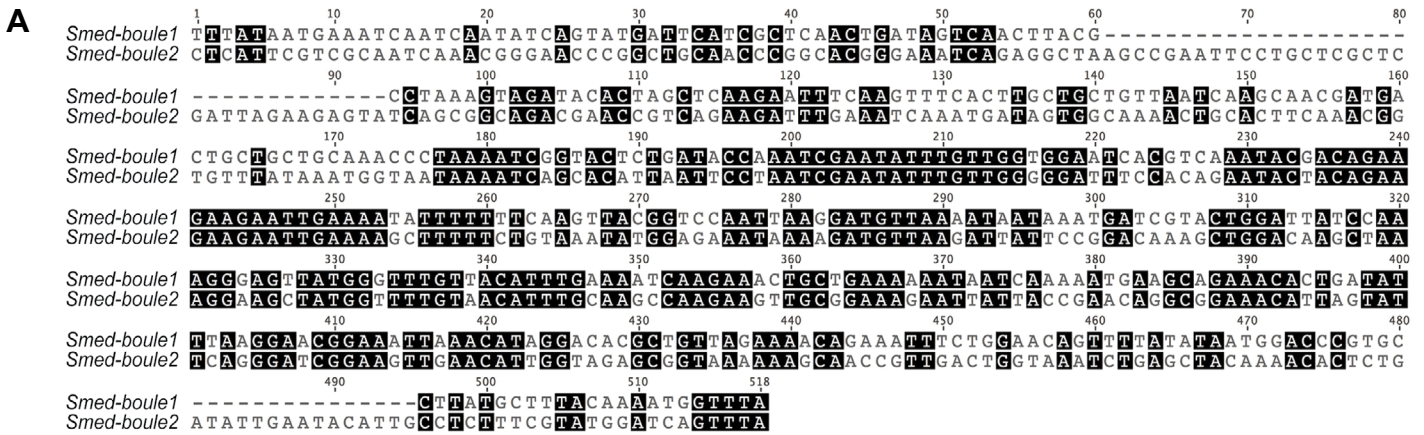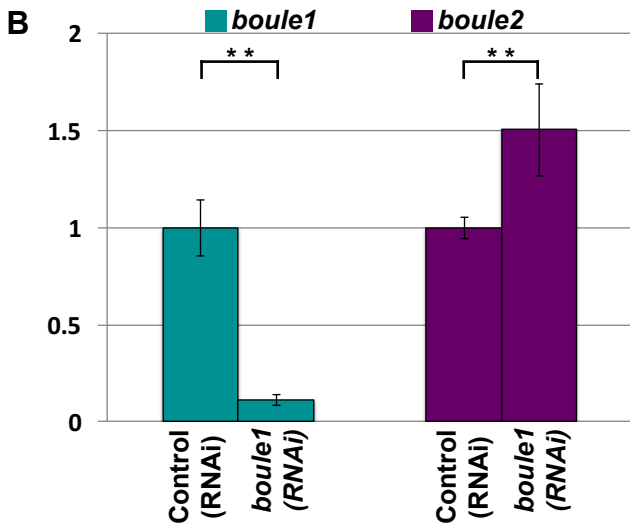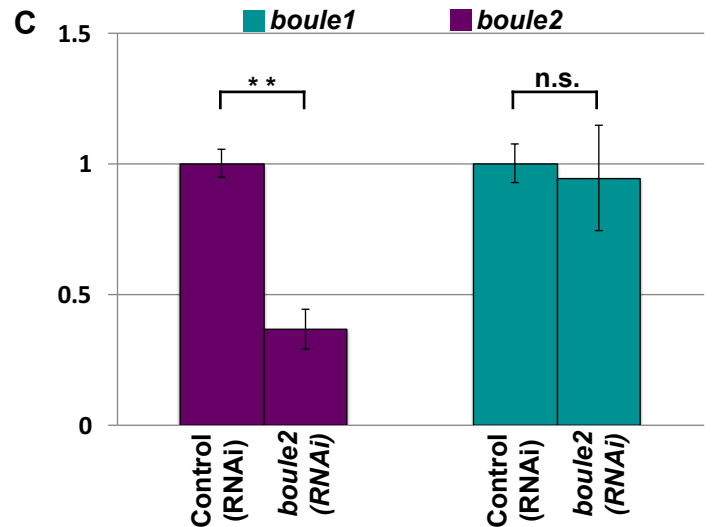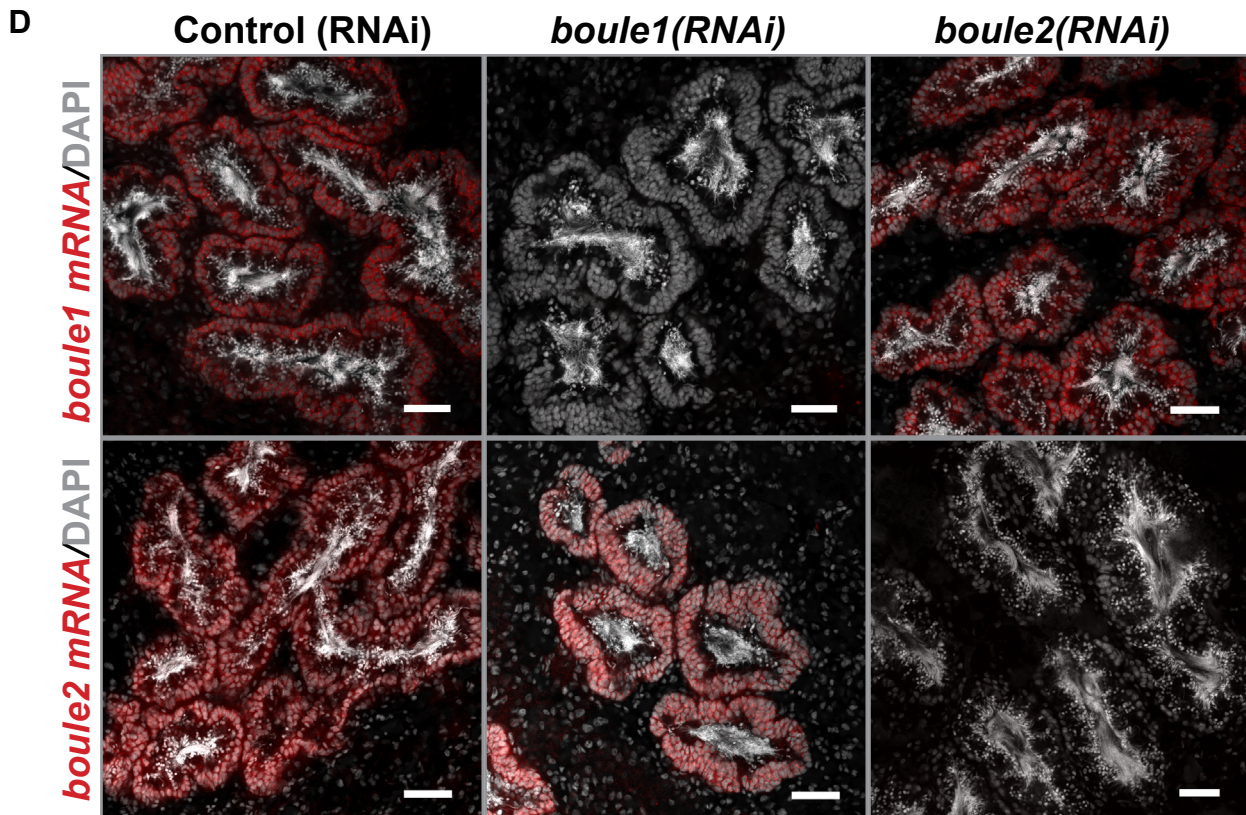





Figure S6

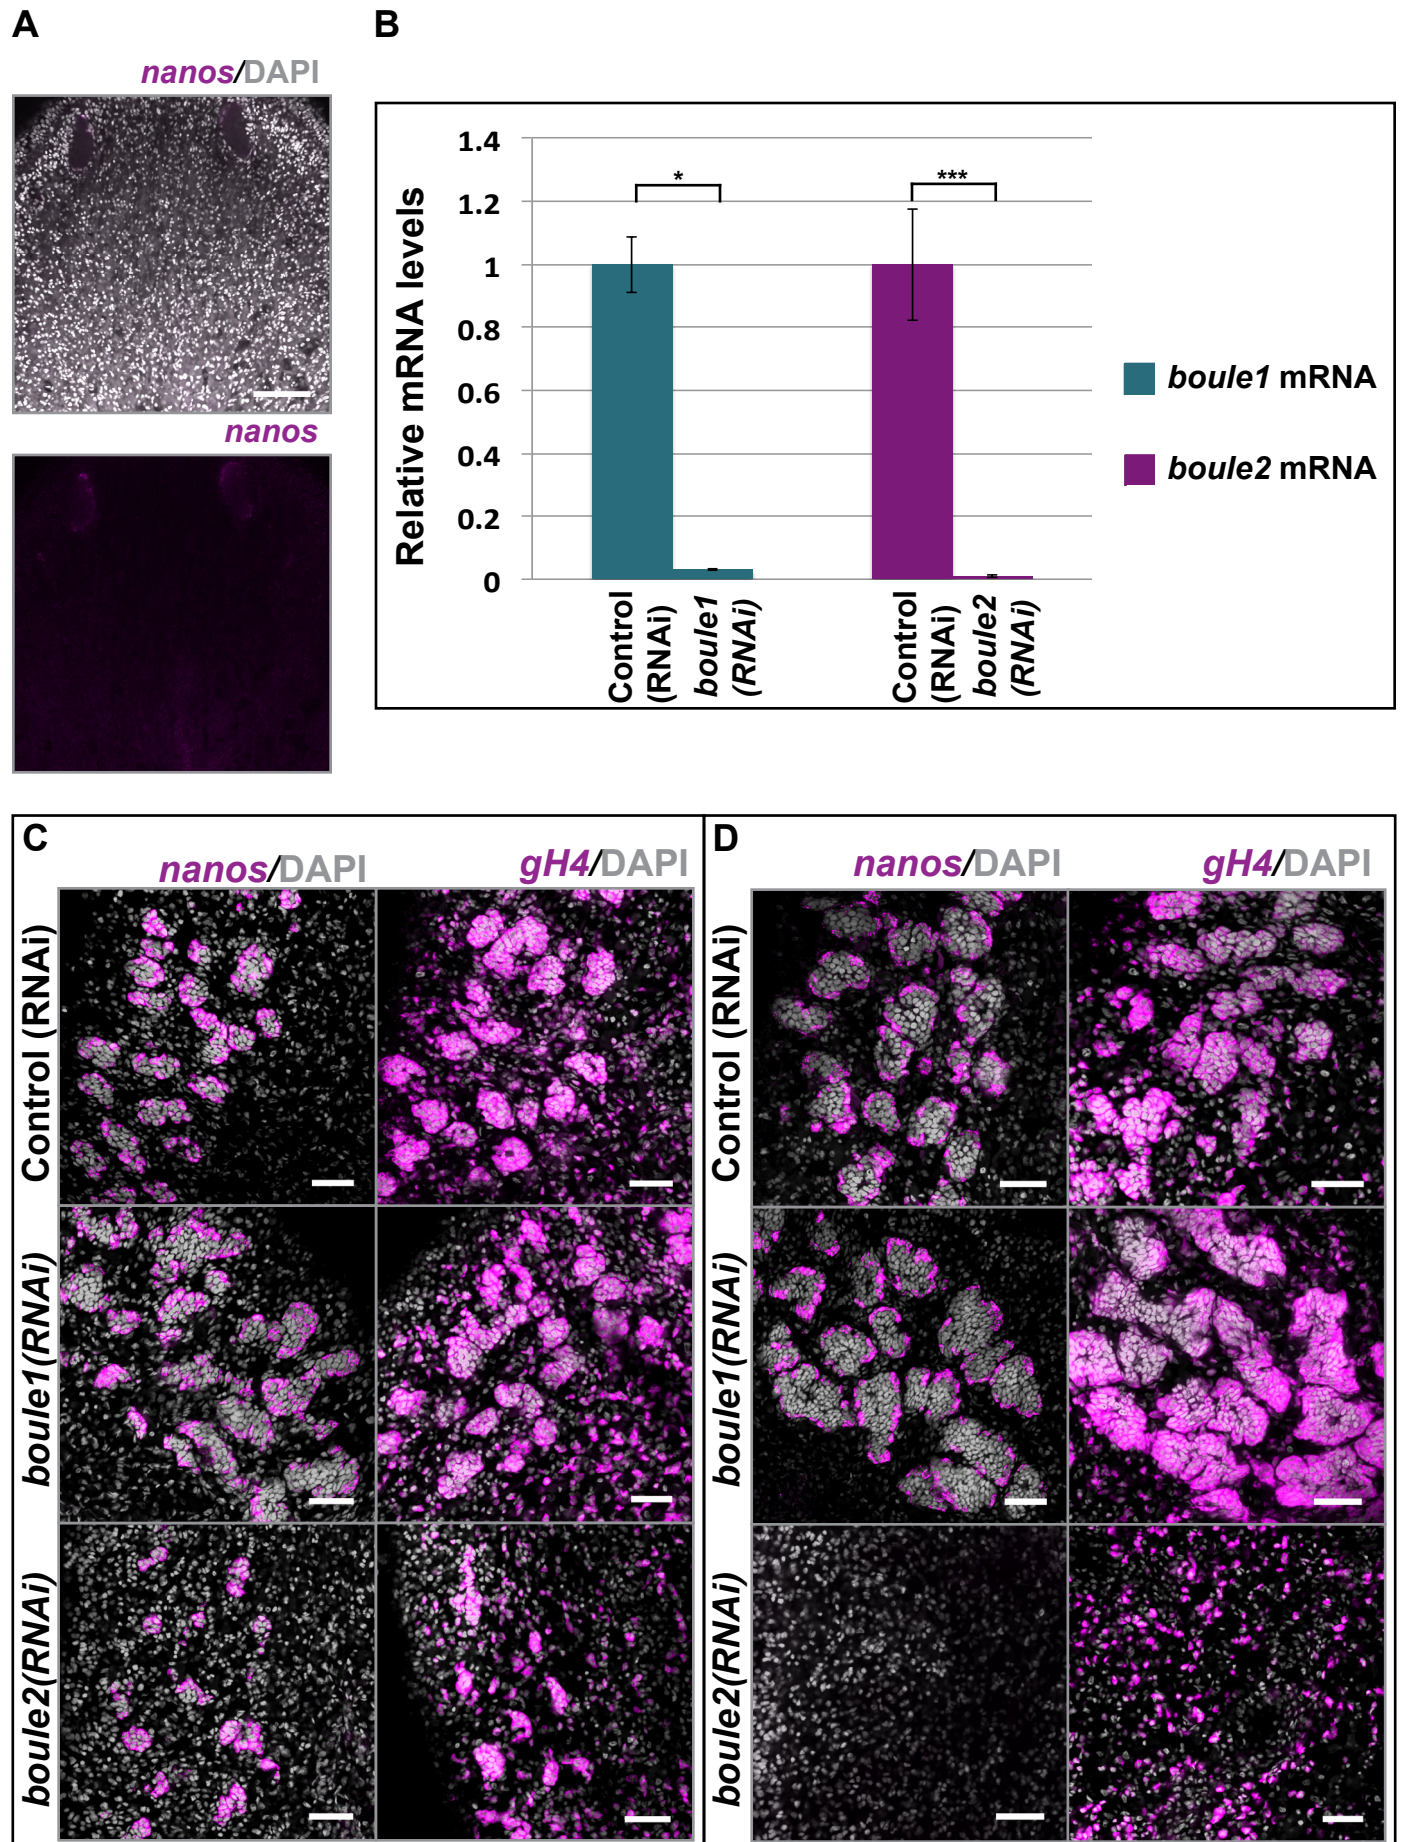

Figure S7

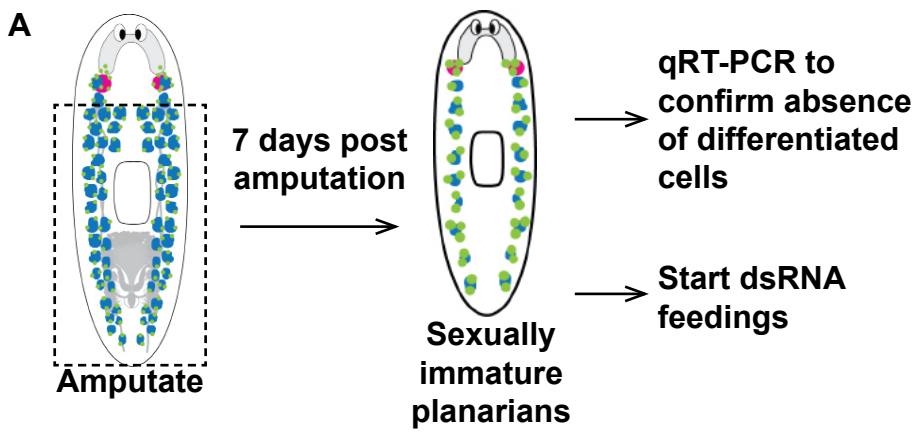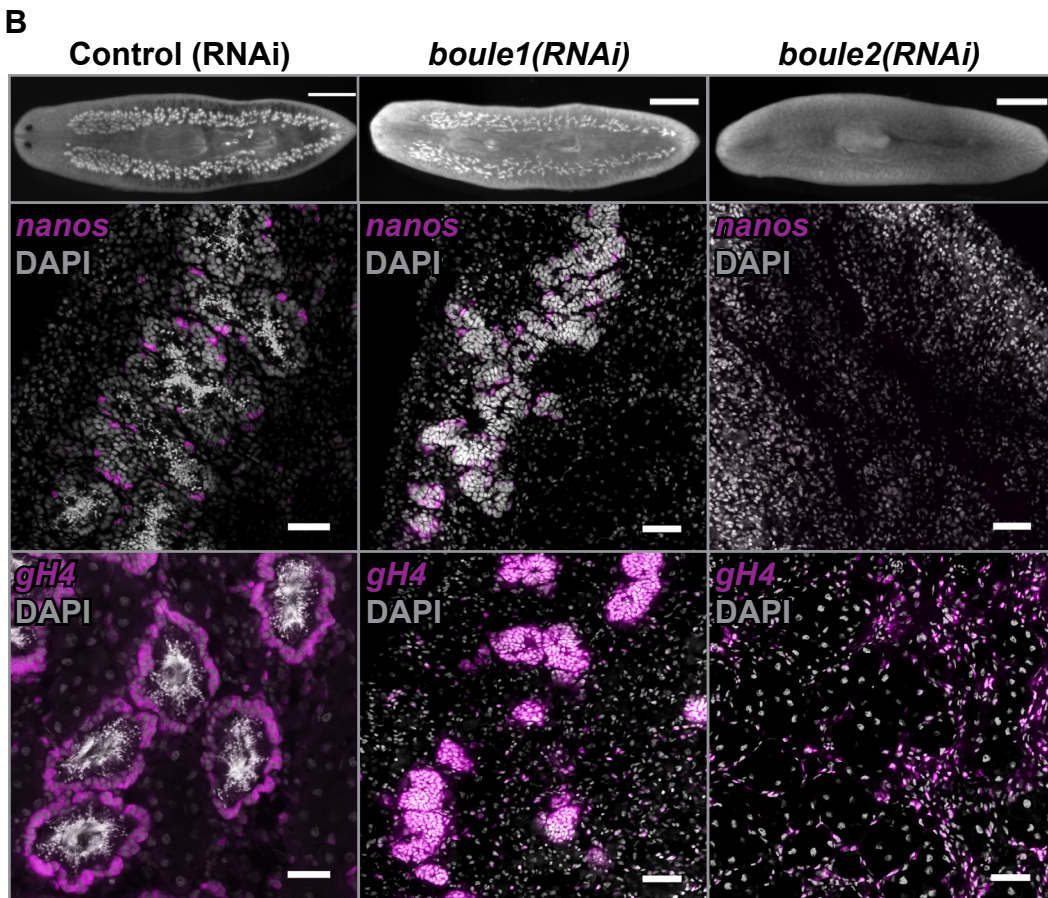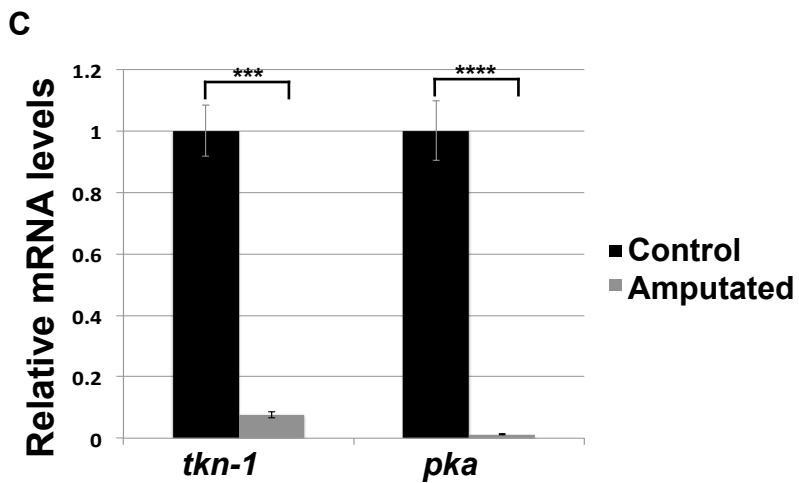



Figure S8

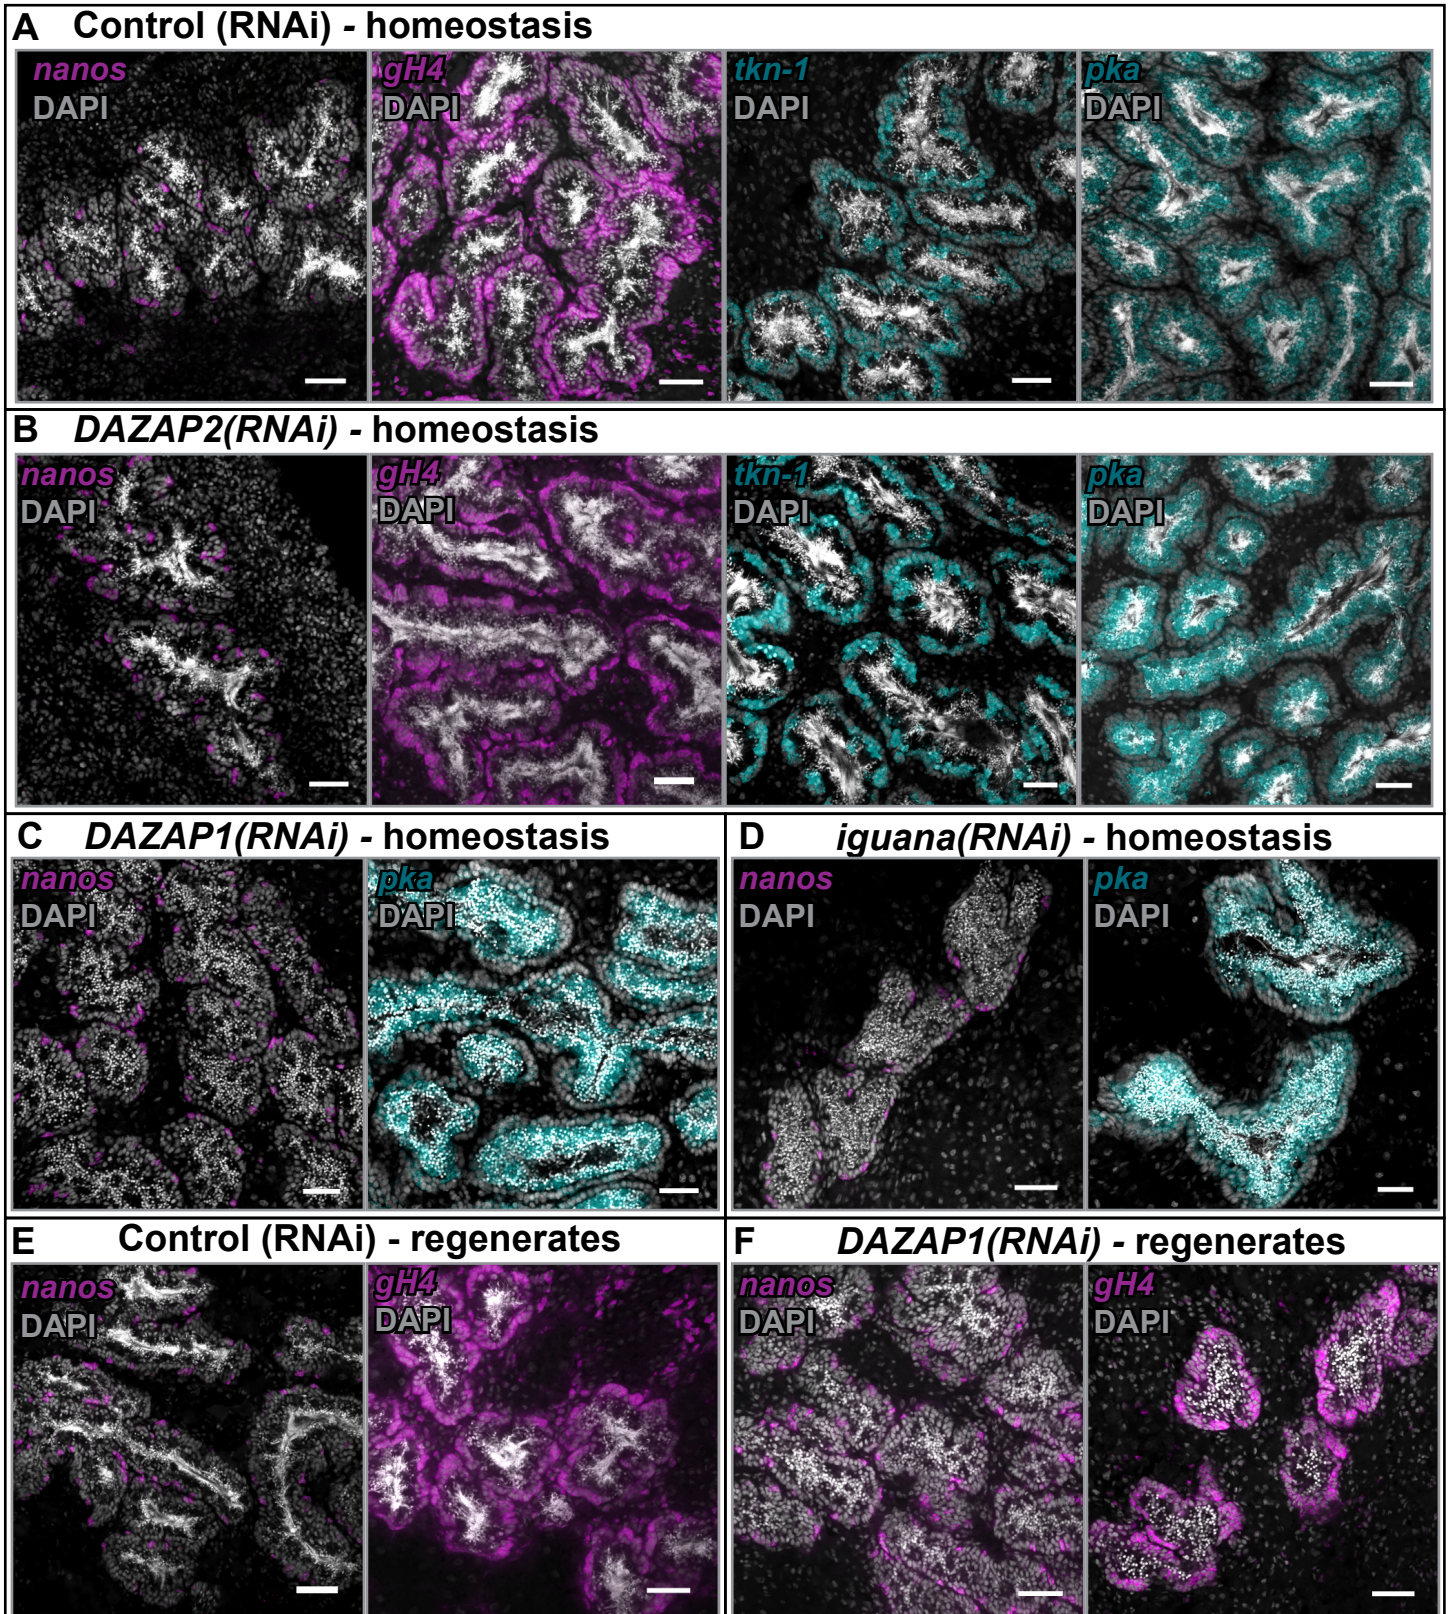



Figure S9

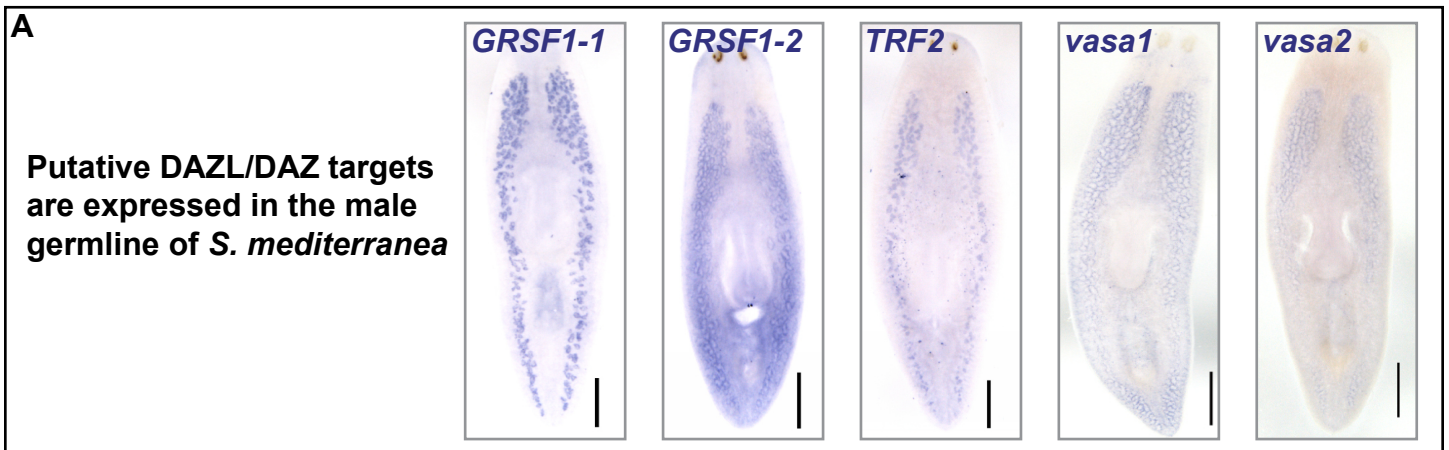

SSCs and spermatids in early stages of *SDAD1*, *CDC25-1*, and *CDC25-2* knockdown

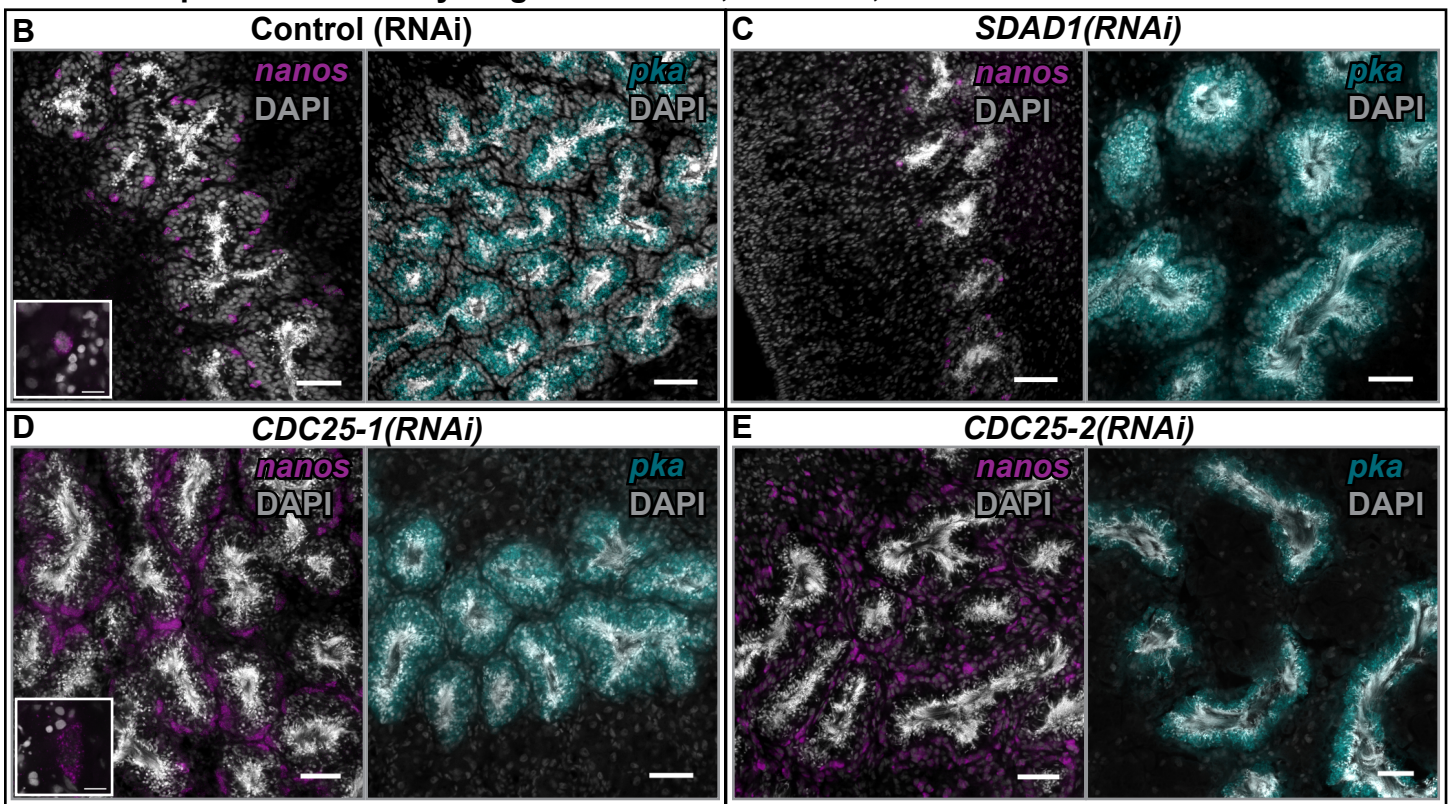

*CDC25-2*(RNAi) and *boule2*(RNAi) in sexually immature regenerates phenocopy each other

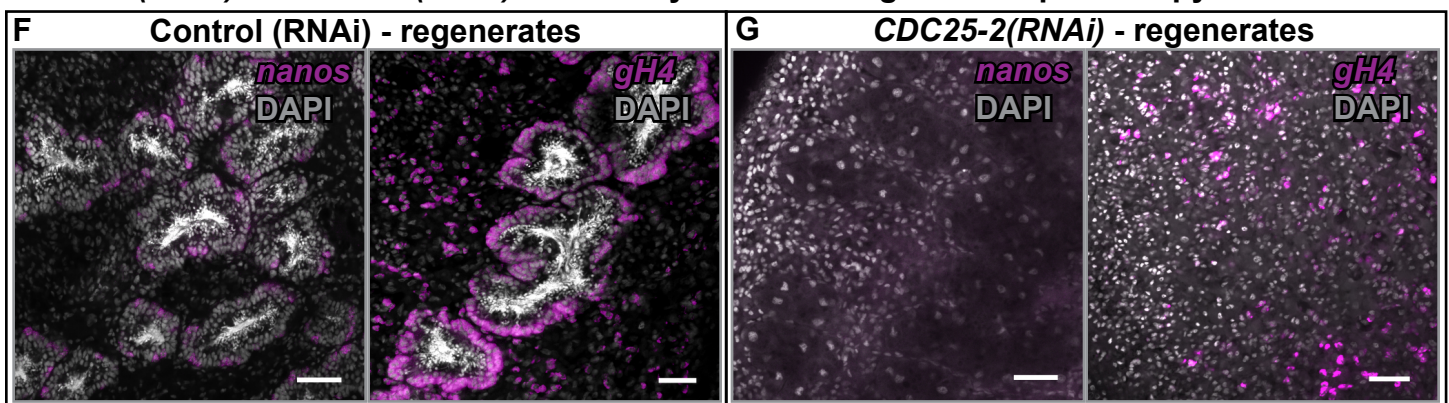



Figure S10

A

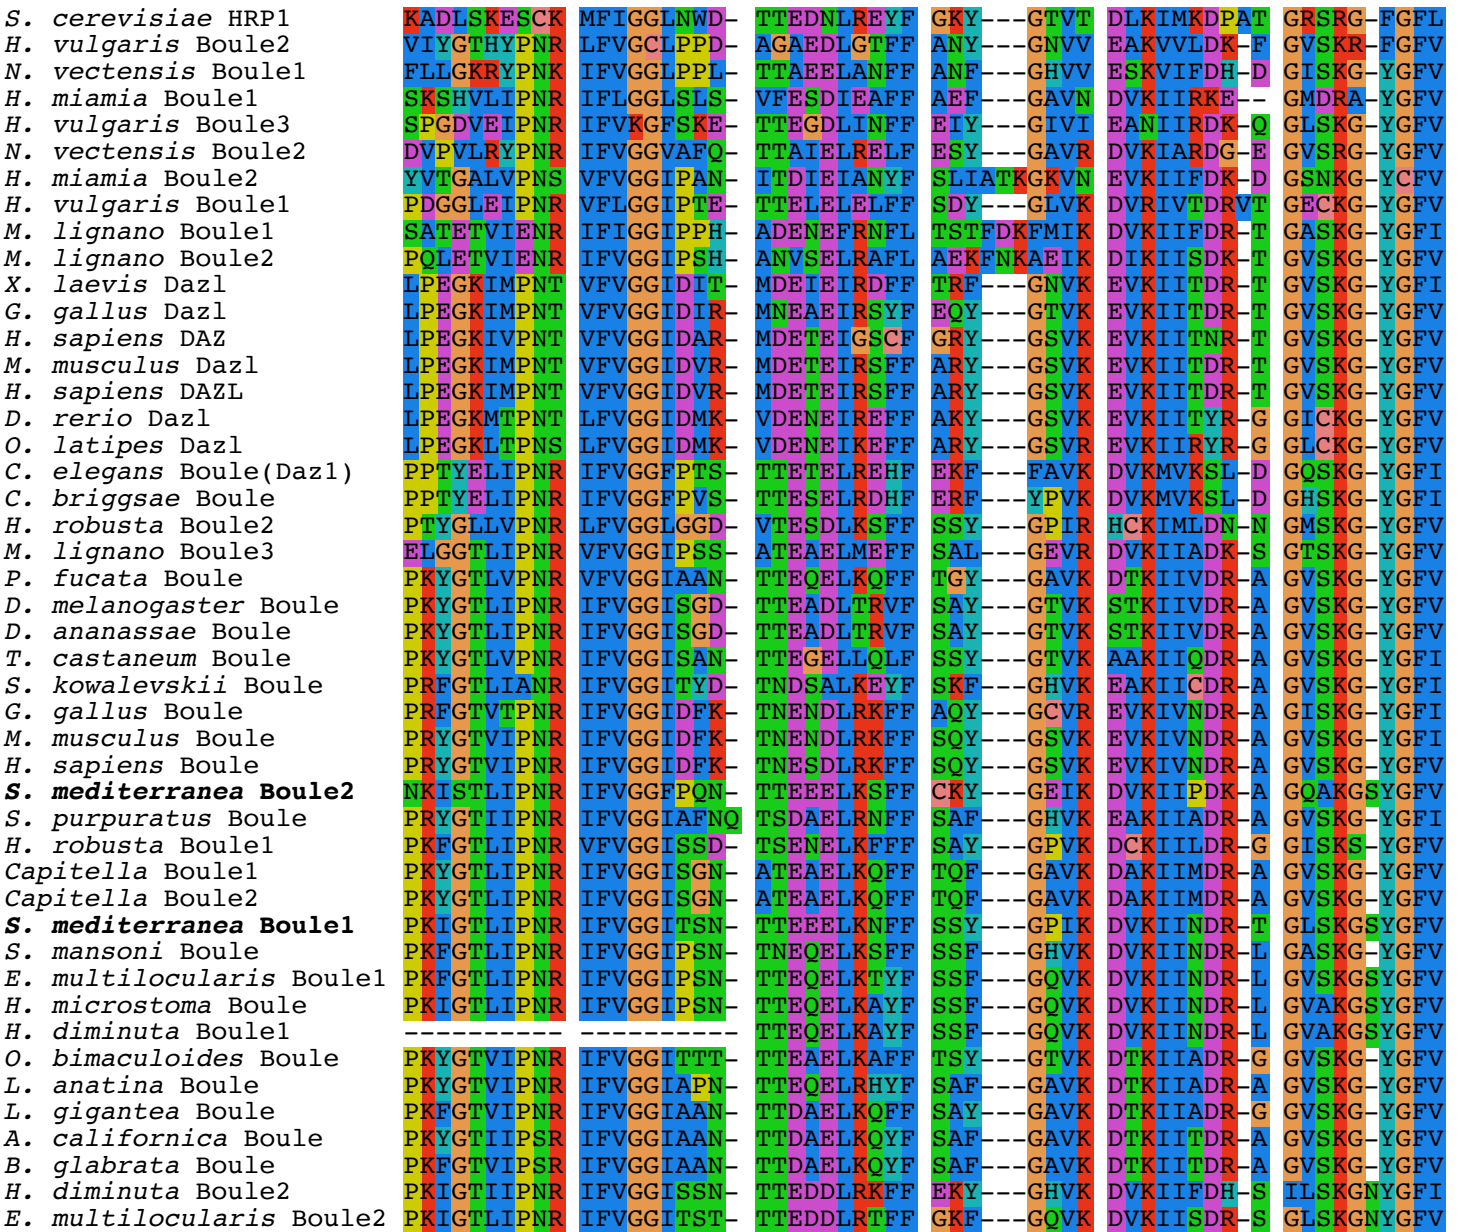

B Branch length ratio

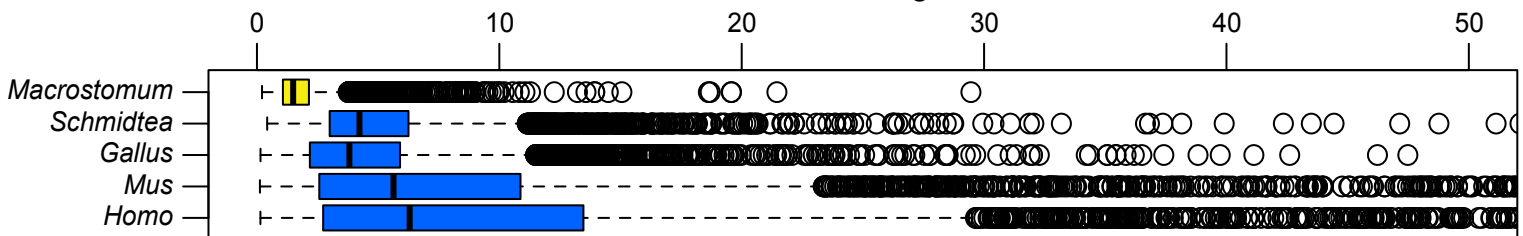

**Table S1. Experimental details for planarian homologs of DAZ-associated proteins**

| <b>Associated protein name</b> | <b>Required for regeneration</b>       | <b>Expressed in male germ cells?</b> | <b>Germ cell RNAi phenotype in adult sexually mature worms</b> | <b>Germ cell RNAi phenotype in hatchlings</b> | <b>Required for <i>de novo</i> specification of germ cells?</b> | <b>RNAi phenotype in sexually immature regenerates</b> |
|--------------------------------|----------------------------------------|--------------------------------------|----------------------------------------------------------------|-----------------------------------------------|-----------------------------------------------------------------|--------------------------------------------------------|
| <i>DAZAP1</i>                  | No                                     | Yes                                  | No mature sperm                                                | No mature sperm                               | No                                                              | No mature sperm                                        |
| <i>DAZAP2</i>                  | No                                     | Yes                                  | No phenotype                                                   | No phenotype                                  | No                                                              | Small testes with only SSCs and spermatogonia          |
| <i>DAZAP1+2</i>                | No                                     | -                                    | No mature sperm                                                | Not tested                                    | Not tested                                                      | Not tested                                             |
| <i>DZIP/Smed-iguana</i>        | Yes (bloating observed in homeostasis) | Yes                                  | No mature sperm                                                | Not tested                                    | Lysis                                                           | Lysis, no testes in remaining fragments                |
| <i>pumilio</i>                 | Yes                                    | Yes                                  | Small testes, no loss of specific cell type marker             | Not tested                                    | Lysis                                                           | Lysis, no testes in remaining fragments                |

**Table S2. Experimental details for planarian homologs of DAZ family targets**

| Target name      | Required for regeneration (neoblast maintenance)? | Expressed in the male germ cells? | Germ cell RNAi phenotype in adult sexually mature worms        | Germ cell RNAi phenotype in hatchlings | Required for <i>de novo</i> germ cell specification? | RNAi phenotype in sexually immature regenerates |
|------------------|---------------------------------------------------|-----------------------------------|----------------------------------------------------------------|----------------------------------------|------------------------------------------------------|-------------------------------------------------|
| <i>CDC25-1</i>   | Yes                                               | Yes                               | Loss of early germ cells followed by more differentiated cells | No male germ cells                     | Lysis                                                | Lysis, no testes in remaining fragments         |
| <i>CDC25-2</i>   | No                                                | Yes                               | Loss of early germ cells followed by more differentiated cells | No male germ cells                     | No                                                   | No testes                                       |
| <i>SDAD1</i>     | Yes                                               | Yes                               | Loss of early germ cells followed by more differentiated cells | Not tested                             | Lysis                                                | Lysis                                           |
| <i>CDC25-3</i>   | No                                                | Not tested                        | No                                                             | Not tested                             | No                                                   | No                                              |
| <i>vasa1</i>     | Yes                                               | Yes                               | Small testes, no loss of specific cell type marker             | Not tested                             | Lysis                                                | Lysis                                           |
| <i>vasa2</i>     | No                                                | Yes                               | No                                                             | Not tested                             | No                                                   | Small testes with only SSCs and spermatogonia   |
| <i>Ringo/SPY</i> | No                                                | Yes                               | No mature sperm                                                | Not tested                             | No                                                   | Small testes with only SSCs and spermatogonia   |
| <i>TPX-1</i>     | No                                                | No                                | No                                                             | Not tested                             | No                                                   | No                                              |
| <i>TRF2-1</i>    | No                                                | Yes                               | No                                                             | Not tested                             | No                                                   | No                                              |
| <i>TRF2-2</i>    | No                                                | No                                | No                                                             | Not tested                             | No                                                   | No                                              |
| <i>TRF2-3</i>    | No                                                | No                                | No                                                             | Not tested                             | No                                                   | No                                              |
| <i>GRSF1-1</i>   | Yes                                               | Yes                               | Early lysis                                                    | Not tested                             | Lysis                                                | Lysis                                           |
| <i>GRSF1-2</i>   | No                                                | Yes                               | No                                                             | Not tested                             | No                                                   | No                                              |
| <i>PAM</i>       | No                                                | Not tested                        | No                                                             | Not tested                             | No                                                   | No                                              |
| <i>TSSK</i>      | No                                                | Not tested                        | No                                                             | Not tested                             | No                                                   | No                                              |

**Table S3. Accession numbers of sequences used for phylogenetic analyses**

| <b>Organism</b>                      | <b>Common name/taxon</b> | <b>Gene name</b> | <b>NCBI Accession number/source</b> |
|--------------------------------------|--------------------------|------------------|-------------------------------------|
| <i>Aplysia californica</i>           | Mollusc                  | Boule            | XP_005103136                        |
| <i>Caenorhabditis elegans</i>        | Nematode                 | Boule            | NM_062635.4                         |
| <i>Caenorhabditis briggsae</i>       | Nematode                 | Boule            | XP_002630720                        |
| <i>Drosophila ananassae</i>          | Arthropod (Diptera)      | Boule            | XP_001958310                        |
| <i>Drosophila melanogaster</i>       | Arthropod (Diptera)      | Boule            | Q24207                              |
| <i>Gallus gallus</i>                 | Aves                     | Boule            | XP_421917                           |
| <i>Hofstenia miamia</i>              | Acoelomorpha             | Boule1           | Not available                       |
| <i>Hofstenia miamia</i>              | Acoelomorpha             | Boule2           | Not available                       |
| <i>Homo sapiens</i>                  |                          | Boule            | NP_001271291.1                      |
| <i>Hydra vulgaris</i>                | Cnidaria                 | Boule1           | JN379588                            |
| <i>Hydra vulgaris</i>                | Cnidaria                 | Boule2           | JN379589                            |
| <i>Hydra vulgaris</i>                | Cnidaria                 | Boule3           | JN379590                            |
| <i>Macrostomum lignano</i>           | Flatworm (Turbulera)     | Boule1           | HM222645                            |
| <i>Macrostomum lignano</i>           | Flatworm (Turbulera)     | Boule2           | JF911416                            |
| <i>Macrostomum lignano</i>           | Flatworm (Turbulera)     | Boule3           | JF911417                            |
| <i>Mus musculus</i>                  | Mouse                    | Boule            | NM_029267.3                         |
| <i>Nematostella vectensis</i>        | Cnidaria                 | Boule1           | XM_001635170                        |
| <i>Nematostella vectensis</i>        | Cnidaria                 | Boule2           | XM_001637198                        |
| <i>Saccoglossus kowalevskii</i>      | Hemichordate             | Boule            | XM_011683988.1                      |
| <i>Schistosoma mansoni</i>           | Flatworm (Trematode)     | Boule            | XM_002575473                        |
| <i>Schmidtea mediterranea</i>        | Flatworm (Turbulera)     | Boule1           | KU519616                            |
| <i>Schmidtea mediterranea</i>        | Flatworm (Turbulera)     | Boule2           | KU519617                            |
| <i>Strongylocentrotus purpuratus</i> | Echinoderm               | Boule            | XM_011683988.1                      |

|                                    |                        |        |                                                                             |
|------------------------------------|------------------------|--------|-----------------------------------------------------------------------------|
| <i>Tribolium castaneum</i>         | Arthropod (Coleoptera) | Boule  | EFA05679                                                                    |
| <i>Lingula anatina</i>             | Brachiopod             | Boule  | <a href="http://marinegenomics.oist.jp/">http://marinegenomics.oist.jp/</a> |
| <i>Pinctada fucata</i>             | Pearl Oyster           | Boule  | <a href="http://marinegenomics.oist.jp/">http://marinegenomics.oist.jp/</a> |
| <i>Biomphalaria glabrata</i>       | Snail                  | Boule  | XR_001216766.1                                                              |
| <i>Lottia gigantea</i>             | Sea snail              | Boule  | <a href="http://genome.jgi.doe.gov/">http://genome.jgi.doe.gov/</a>         |
| <i>Capitella sp. I ESC-2004</i>    | Polychaete             | Boule1 | <a href="http://genome.jgi.doe.gov/">http://genome.jgi.doe.gov/</a>         |
| <i>Capitella sp. I ESC-2004</i>    | Polychaete             | Boule2 | <a href="http://genome.jgi.doe.gov/">http://genome.jgi.doe.gov/</a>         |
| <i>Octopus bimaculoides</i>        |                        | Boule  | XM_014929311.1                                                              |
| <i>Helobdella robusta</i>          | Leech                  | Boule1 | <a href="http://genome.jgi.doe.gov/">http://genome.jgi.doe.gov/</a>         |
| <i>Helobdella robusta</i>          | Leech                  | Boule2 | <a href="http://genome.jgi.doe.gov/">http://genome.jgi.doe.gov/</a>         |
| <i>Echinococcus multilocularis</i> | Flatworm (Cestode)     | Boule1 | parasite.wormbase.org                                                       |
| <i>Echinococcus multilocularis</i> | Flatworm (Cestode)     | Boule2 | parasite.wormbase.org                                                       |
| <i>Hymenolepis diminuta</i>        | Flatworm (Cestode)     | Boule1 | parasite.wormbase.org                                                       |
| <i>Hymenolepis diminuta</i>        | Flatworm (Cestode)     | Boule2 | parasite.wormbase.org                                                       |
| <i>Hymenolepis microstoma</i>      | Flatworm (Cestode)     | Boule  | parasite.wormbase.org                                                       |
| <i>Taenia asiatica</i>             | Flatworm (Cestode)     | Boule  | parasite.wormbase.org                                                       |
| <i>Danio rerio</i>                 | Zebrafish              | Dazl   | AB018191.1                                                                  |
| <i>Gallus gallus</i>               | Aves                   | Dazl   | NM_204218.1                                                                 |
| <i>Mus musculus</i>                | Mouse                  | Dazl   | NM_010021.5                                                                 |
| <i>Homo sapiens</i>                |                        | DAZL   | NM_001190811.1                                                              |
| <i>Oryzias latipes</i>             | Japenese killfish      | Dazl   | NP_001098269.1                                                              |
| <i>Xenopus laevis</i>              | Frog                   | Dazl   | AF017778.1                                                                  |
| <i>Homo sapiens</i>                |                        | DAZ    | U21663.1                                                                    |

**Table S4. Cloning and qRT-PCR primer sequences****Cloning primers**

| <b>Gene name</b>   | <b>Forward cloning primer</b> | <b>Reverse cloning primer</b> | <b>Genbank accession number</b> |
|--------------------|-------------------------------|-------------------------------|---------------------------------|
| <i>boule1</i>      | TGCAAACAAAATGTCAACTGAT        | CATAAGGCACGGGTCCAT            | KU519616                        |
| <i>boule2</i>      | TATTTGTTGGGGGATTTCCA          | CTTTGAGGTGTTGCCATTGA          | KU519617                        |
| <i>CDC25-1</i>     | TCACAACACTCCTGAAACACCA        | TTCTGGTCCACGAACCGATG          | KU852687                        |
| <i>CDC25-2</i>     | ATGCAATATTTCTGTCAGTC          | AAGACGCTTAATATCACATC          | KU852688                        |
| <i>CDC25-3</i>     | TGGCCACCTGTTTATTCCTC          | CGACTTGACAATTCCCATCA          | KU852689                        |
| <i>DAZAP1</i>      | GATGGTAACGAGATTGGAAA          | TATGACGTTGTTTGGTTTGA          | KU852669                        |
| <i>DAZAP2</i>      | TGACGGTGTCATAAAAAGTCA         | AGCTCCTTGATCCCATAAAT          | KU852670                        |
| <i>DZIP/iguana</i> | ATCACCGTTGTCCATATTGT          | GTCATCCTCCAAATTTTCA           | KU852671                        |
| <i>GRSF1-1</i>     | TACAGGGGAGGCATTTGTTC          | TCCGTCTGGGCCTATTTGTA          | KU852676                        |
| <i>GRSF1-2</i>     | GAGAAAGGCCACGAAGAGAA          | AAAACATCATCTGGGCGTGT          | KU852677                        |
| <i>PAM</i>         | ACCGTCAGACCAAACGAAC           | TGCTTGAGCCACATCTGAAC          | KU852680                        |
| <i>pumilio</i>     | GGCAGGATTGTGCAACTCAG          | CCAAGATCCTGATTGTTTTTCA        | KU852681                        |
| <i>Ringo/SPY</i>   | GCTCACGATGTGGAAGAAGA          | ATCTGACTCGTCGCTGTCAT          | KU852682                        |
| <i>SDAD1</i>       | TGGAGTTGCTGTCGAGATTG          | CTTTCGGTTTTTGCTTGCTC          | KU852686                        |
| <i>TPX1</i>        | TTCTAACCGCCCATAACACC          | CAGAGTCCGTCATTGCATGT          | KU852672                        |
| <i>TRF2-1</i>      | CACTTTTTCCAGTGGTCATGATT       | CATTGGACGCGAGTTCATAA          | KU852673                        |
| <i>TRF2-2</i>      | TTGTGATGCCTACACCTCAGTT        | TTTTCCCGAAACGAAAATCA          | KU852674                        |
| <i>TRF2-3</i>      | TATCGCCTGCTTTTTTCGACT         | TCTTTTCTCCGGTCAAAT            | KU852675                        |
| <i>TSSK</i>        | TTGCTGAAAATCGAGAACAG          | ACTCGTCAGACTCGTTGCAC          | KU852683                        |
| <i>vasa1</i>       | TTGACCCAGTGCAAAAATA           | GCCAACAACCTCAACAGCTA          | KU852684                        |
| <i>vasa2</i>       | TTCCAACGCGTGAATTATGT          | GTCGCCATGGATTGTAGTTG          | KU852685                        |

**qRT-PCR primers**

| <b>Gene name</b>                  | <b>Forward qRT-PCR primer</b> | <b>Reverse qRT-PCR primer</b> |
|-----------------------------------|-------------------------------|-------------------------------|
| <i>boule1</i>                     | TCAAGCAACGATGACTGCTG          | TTTGACGTGATTCCACCAAC          |
| <i>boule2</i>                     | CCACTATCAATGGCAACACC          | TCAACGGTTCTACTGGCATC          |
| <i>nanos</i>                      | CAAGGACAAATGTTGCCTGTA         | CAACCCATCGATCCAACCTCT         |
| <i>pka</i>                        | CATAGTCCAAGGCGATGATG          | GGCGTTGTACATCAGTGCTAGT        |
| <i>tkn-1</i>                      | CTGACATGCTTGGCACTTCT          | GCGGTCTTCCCTATTCACTT          |
| <i><math>\beta</math>-tubulin</i> | TGGCTGCTTGTGATCCAAGA          | AAATTGCCGCAACAGTCAAATA        |
